# Supplementary material for: Soil CO 2 efflux from two mountain forests in the Eastern Himalayas Bhutan: components and controls
Source: Copernicus journal article supplement (doi:10.5194/bg-2016-291), 2016-08-08
Supplement: Supplementary file 1 [file bg-2016-291-supplement.pdf]

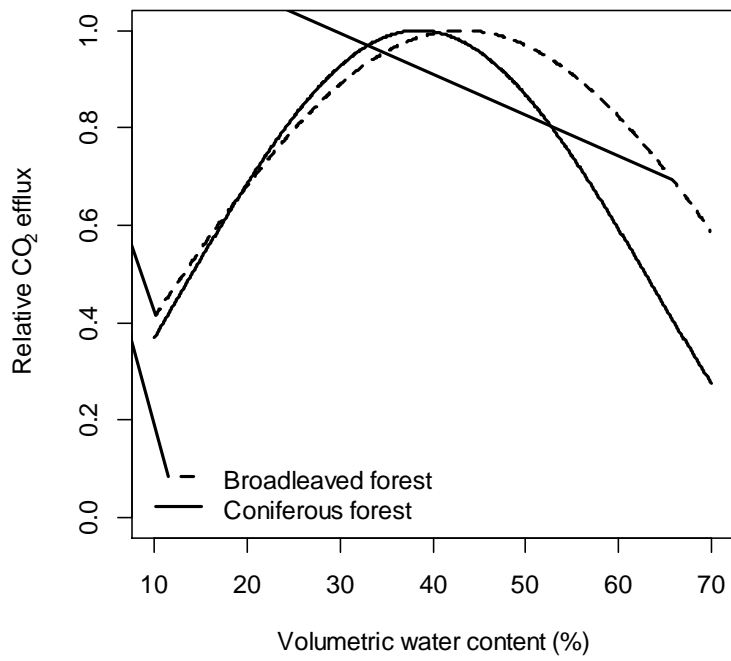

**Figure S1: Response curves of relative CO<sub>2</sub> efflux (heterotrophic soil respiration) to volumetric soil water content derived from a laboratory incubation (see Materials and methods section for details).**
